# Supplementary material
Source: PubMed Central journal article supplement (PMC3719538)
Supplement: JB.02224-12_zjb999092694so1.pdf [file JB.02224-12_zjb999092694so1.pdf]

## Supplemental Figure S1

A

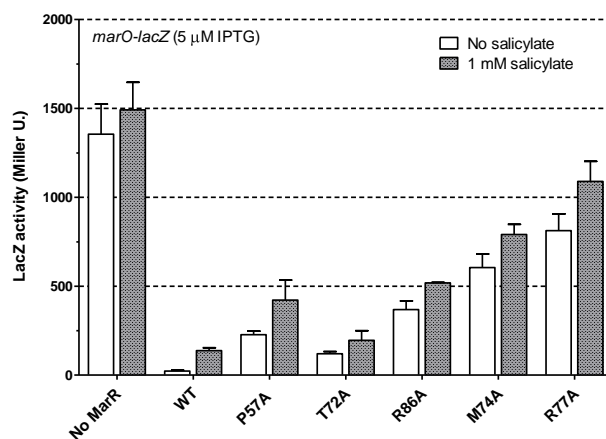

B

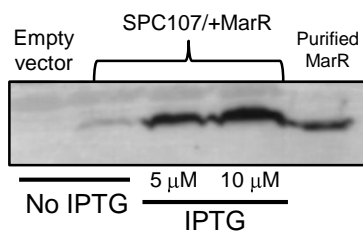

C

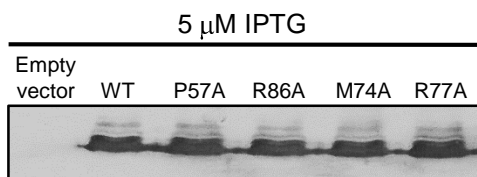

**Figure S1. Activity and expression of MarR variants in complemented SPC107.** (A) Effect of *marR* mutation on  $\beta$ -galactosidase activity from a *marO-lacZ* fusion in SPC107. SPC107 was transformed with plasmids pACT7Sp and pET28a carrying a *marR* variant. Cells were grown in the presence of 5  $\mu$ M IPTG. The data represent the mean  $\pm$  the standard deviation for at least three independent experiments. (B) Western blot analysis using lysates of complemented SPC107 grown in the presence of IPTG as indicated. 10 ng of purified MarR was loaded as a positive control. Lysate from cells carrying pACT7Sp and pET28a without insert was used as a negative control (Empty vector). (C) Expression of MarR mutants in SPC107 in the presence of 5  $\mu$ M IPTG. In panels B and C, MarR was detected using polyclonal anti-MarR antibodies. Each lane contains 10  $\mu$ g of cell lysate.

## Supplemental Figure S2

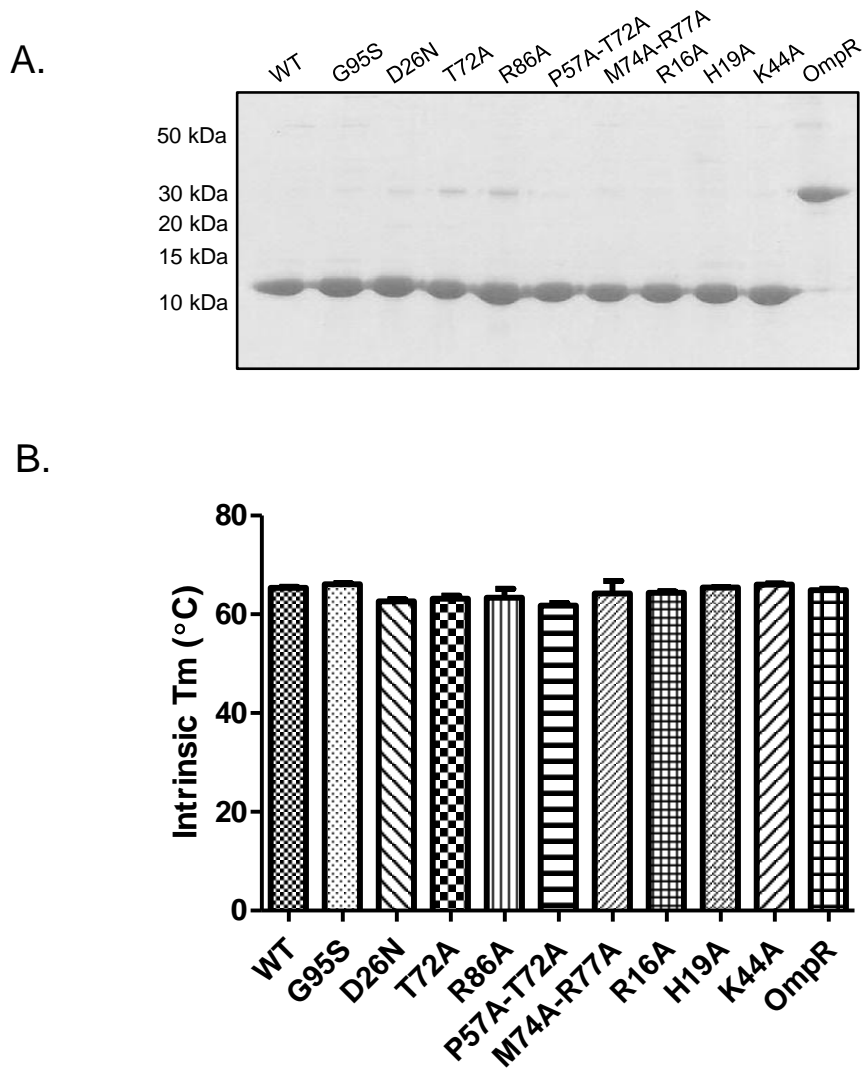

**Figure S2. Purity and intrinsic T<sub>m</sub>.** (A) 15% SDS-PAGE of purified proteins used in this study. 2.5  $\mu$ g of protein was loaded in each lane. After electrophoresis, the gel was stained with Coomassie brilliant blue. (B) Intrinsic T<sub>m</sub> of the proteins studied. The data represent the mean  $\pm$  standard errors of the mean of at least 12 independent experiments.

Supplemental Table S1. Primers used in this study.

| Primers      | Sequence 5'-3'                            | Description           |
|--------------|-------------------------------------------|-----------------------|
| marR-ncoI    | CCCCATGGCCAAAAGTACCAGCGATCTGTTCAATG       | <i>marR</i> external  |
| marR-xhoI    | CCCTCGAGTTACGGCAGGACTTTCTTAAGCAAATACTCAAG | primers               |
| P57A-FW      | GCGGCGTGTATTACTGCGGTTGAACTGAAAAAG         | P57A mutation         |
| P57A-RV      | CTTTTTCAGTTCAACCGCAGTAATACACGCCGC         |                       |
| T72A-FW      | GACCTGGGAGCACTGGCCCGTATGCTGGATCGCCTG      | T72A mutation         |
| T72A-RV      | CAGGCGATCCAGCATAACGGCCAGTGCTCCCAGGTC      |                       |
| R86A-FW      | CTGTAAAGGCTGGGTGGAAGCGTTGCCGAACCCGAATG    | R86A mutation         |
| R86A-RV      | CATTCGGGTTTCGGCAACGCTTCCACCCAGCCTTTACAG   |                       |
| R77A-FW      | ACCCGTATGCTGGATGCCCTGGTCTGTAAAGGCTGG      | R77A mutation         |
| R77A-RV      | CCAGCCTTTACAGACCAGGGCATCCAGCATAACGGGT     |                       |
| M74A-FW      | GGAGCACTGACCCGTGCGCTGGATCGCCTGGTC         | M74A mutation         |
| M74A-RV      | GACCAGGCGATCCAGCGCACGGGTCAGTGCTCC         |                       |
| M74A-R77A-FW | GGAGCACTGACCCGTGCGCTGGATGCCCTGGTCTGTAAA   | M74A-R77A<br>mutation |
| M74A-R77A-RV | CTTTACAGACCAGGGCATCCAGCGCACGGGTCAGTGCTCC  |                       |
| R16A-FW      | GAAATTATTCCATTGGGTGCCTTAATCCATATGG        | R16A mutation         |
| R16A-RV      | CCATATGGATTAAGGCACCCAATGGAATAATTTC        |                       |
| H19A-FW      | TTGGGTCGCTTAATCGCTATGGTTAATCAG            | H19A mutation         |
| H19A-RV      | CTGATTAACCATAGCGATTAAGCGACCCAA            |                       |

|         |                                             |               |
|---------|---------------------------------------------|---------------|
| K44A-FW | GCACAGTTTGCGGTGCTCTGC                       | K44A          |
| K44A-RV | GCAGAGCACCGCAAACCTGTGC                      |               |
| OmpR-FW | CAT ATG CAA GAC AAC TAC AAG ATT CTG GTG GTC | <i>ompR</i>   |
| OmpR-RV | CTC GAG TGC TTT AGA GCC GTC CGG TAC AAA G   | amplification |

---
